# Supplementary material for: Single-Cell RNA-Seq Analysis Reveals the Acquisition of Cancer Stem Cell Traits and Increase of Cell–Cell Signaling during EMT Progression
Source: MDPI journal article supplement (doi:10.3390/cancers13225726), 2021-11-16
Supplement: s1 [file s1]

# **Single cell RNA-seq analysis reveals acquisition of cancer stem cell traits and increase of cell-cell signaling during EMT progression**

**Federico Bocci<sup>1,2</sup>, Peijie Zhou<sup>1</sup>, Qing Nie<sup>1,2,\*</sup>**

**<sup>1</sup>Department of Mathematics, University of California, Irvine, CA, United States; <sup>2</sup>The NSF-Simons Center for Multiscale Cell Fate Research, University of California, Irvine, CA, United States**

**\*Author for correspondence: [qnie@uci.edu](mailto:qnie@uci.edu)**

**Supplementary Material**

## Supplementary Figures

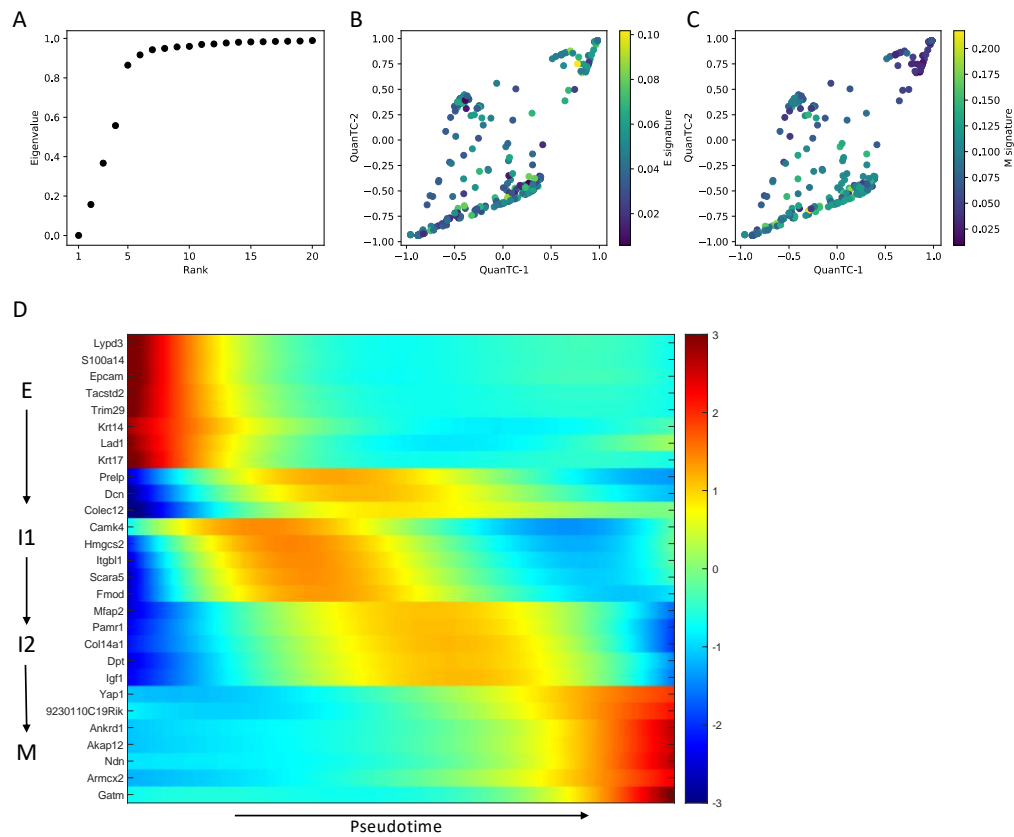

Supplementary Figure S1. **Clustering and analysis of SCC cells.** **(A)** Eigenvalues of the similarity matrix ranked in ascending order. **(B-C)** Epithelial and Mesenchymal signatures of cells in low-dimensional QuanTC projection space. **(D)** Top marker and transition genes identified by QuanTC along the most probable transition path (i.e., the path indicated by black arrows in Fig. 1B).

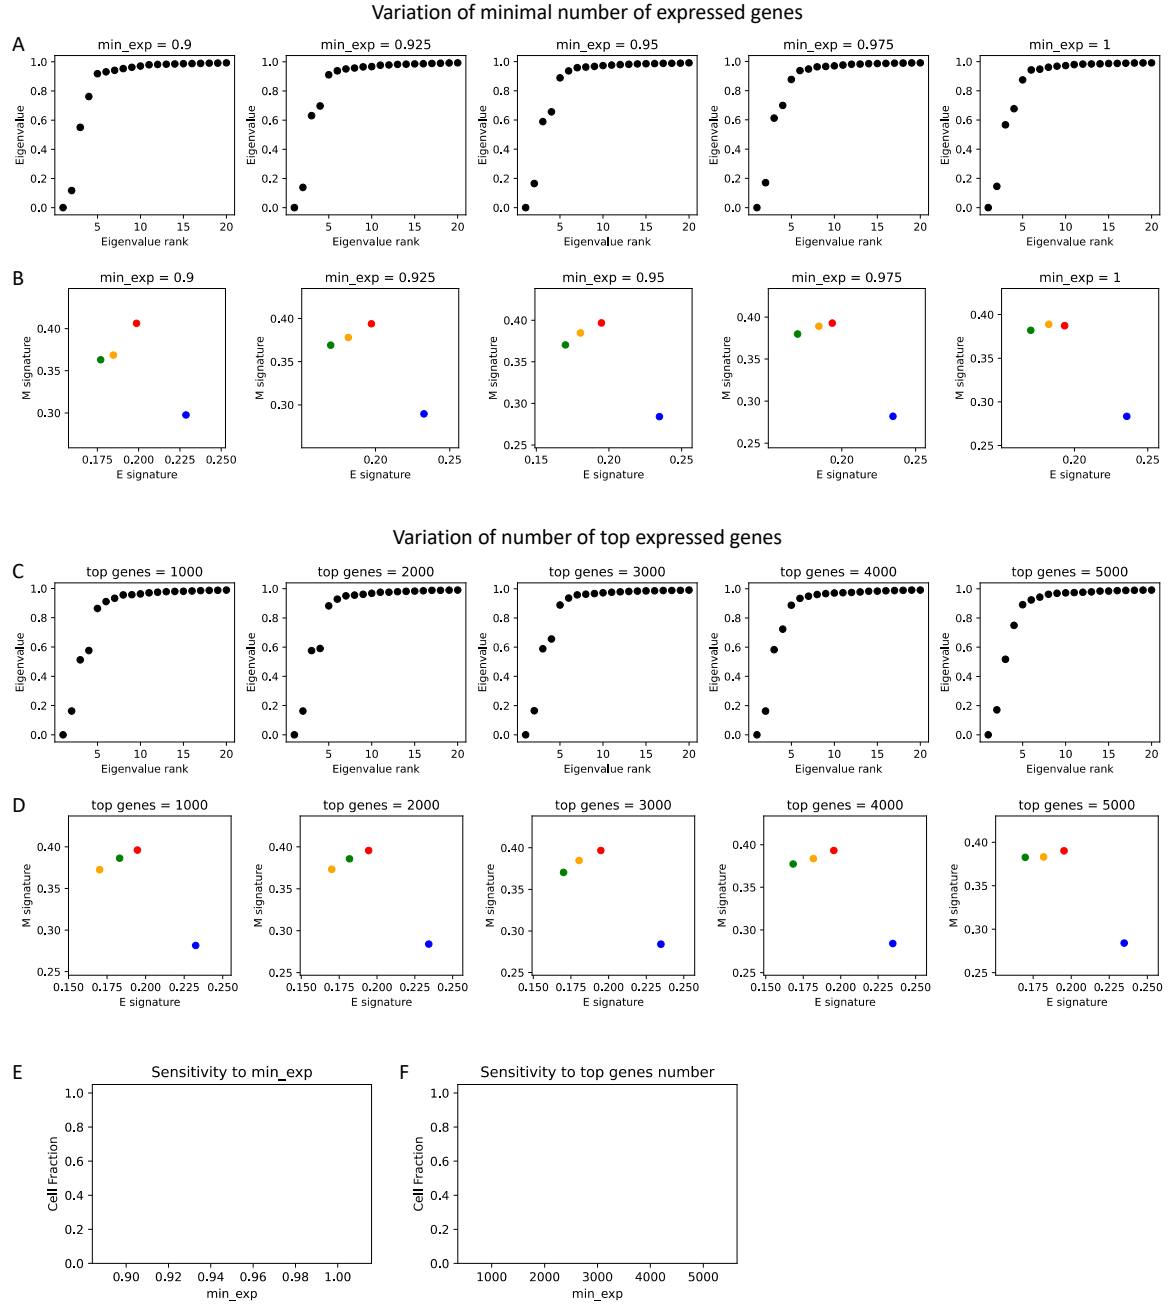

**Supplementary Figure S2. Robustness of SCC clustering.** **(A)** Eigenvalues of the similarity matrix ranked in ascending order for increasing values of `min_exp`, the minimal fraction of expressed genes in QuanTC preprocessing (same as in Fig. S1A, default value = 0.95 used in Fig. 1). **(B)** Projection of clusters in the E-M signature space for increasing values of `min_exp` (same as in Fig. 1B). **(C)** Eigenvalues of the similarity matrix for increasing values of `ngenes`, the number of top expressed genes to selected for QuanTC analysis (default value = 3000). **(D)** Projection of clusters in the E-M signature space for increasing values of `ngenes`. **(E)** Fractions of cells in the E, I1, I2, and M clusters for increasing values of `min_exp`. **(F)** Same as (E) for increasing values of `ngenes`.

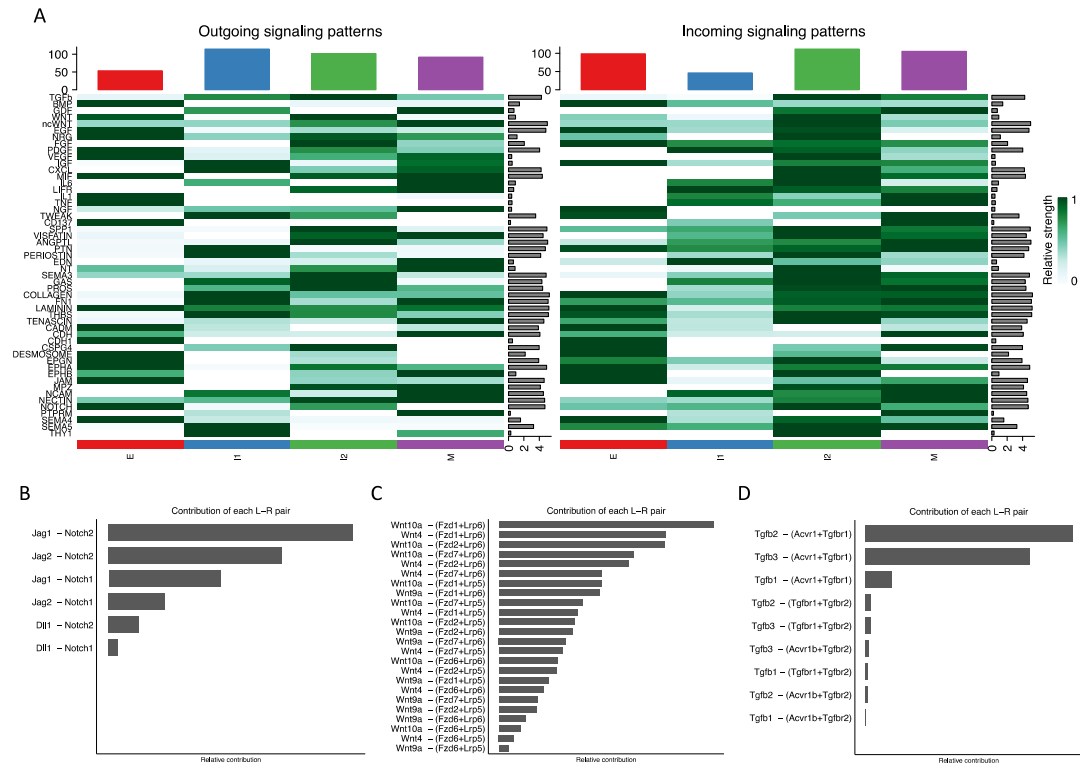

Supplementary Figure S3. **Cellchat analysis of SCC cells.** (A) Quantification of Outgoing and Incoming signaling patterns quantified by CellChat. Top bar plots summarize the Outgoing and Incoming signaling of each cluster (all pathways considered), while the rightmost bar plots quantify the overall strength of the specific pathways (all clusters considered). (B-C-D) Breakdown of the specific ligand-receptor pairs that contribute to Notch (B), WNT (C) and TGF-beta signaling (D).

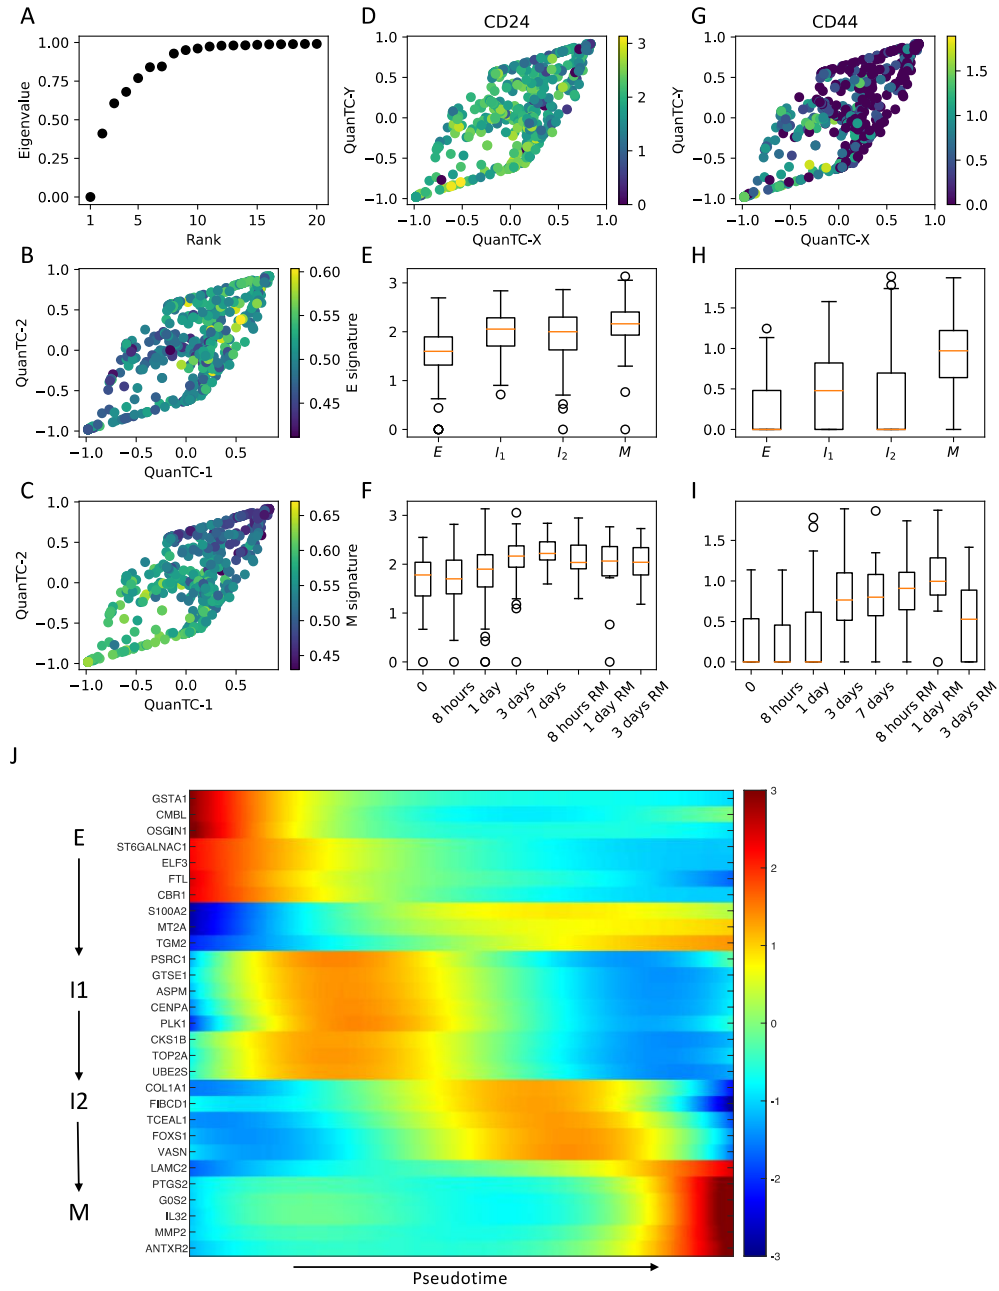

Supplementary Figure S4. **Clustering and analysis of OVCA420 cells under TGFB.** (A) Eigenvalues of the similarity matrix ranked in ascending order. (B-C) Epithelial and Mesenchymal signatures of cells in low-dimensional QuantTC projection space. (D) Scatterplot of CD24 in QuantTC space. (E) Boxplot of CD24 expression by cluster. (F) Boxplot of CD24 expression by anatomical location. (G-H-I) Same as (D-E-F) for CD44. (J) Top marker and transition genes identified by QuantTC along the most probable transition path (i.e., the path indicated by black arrows in Fig. 2B).



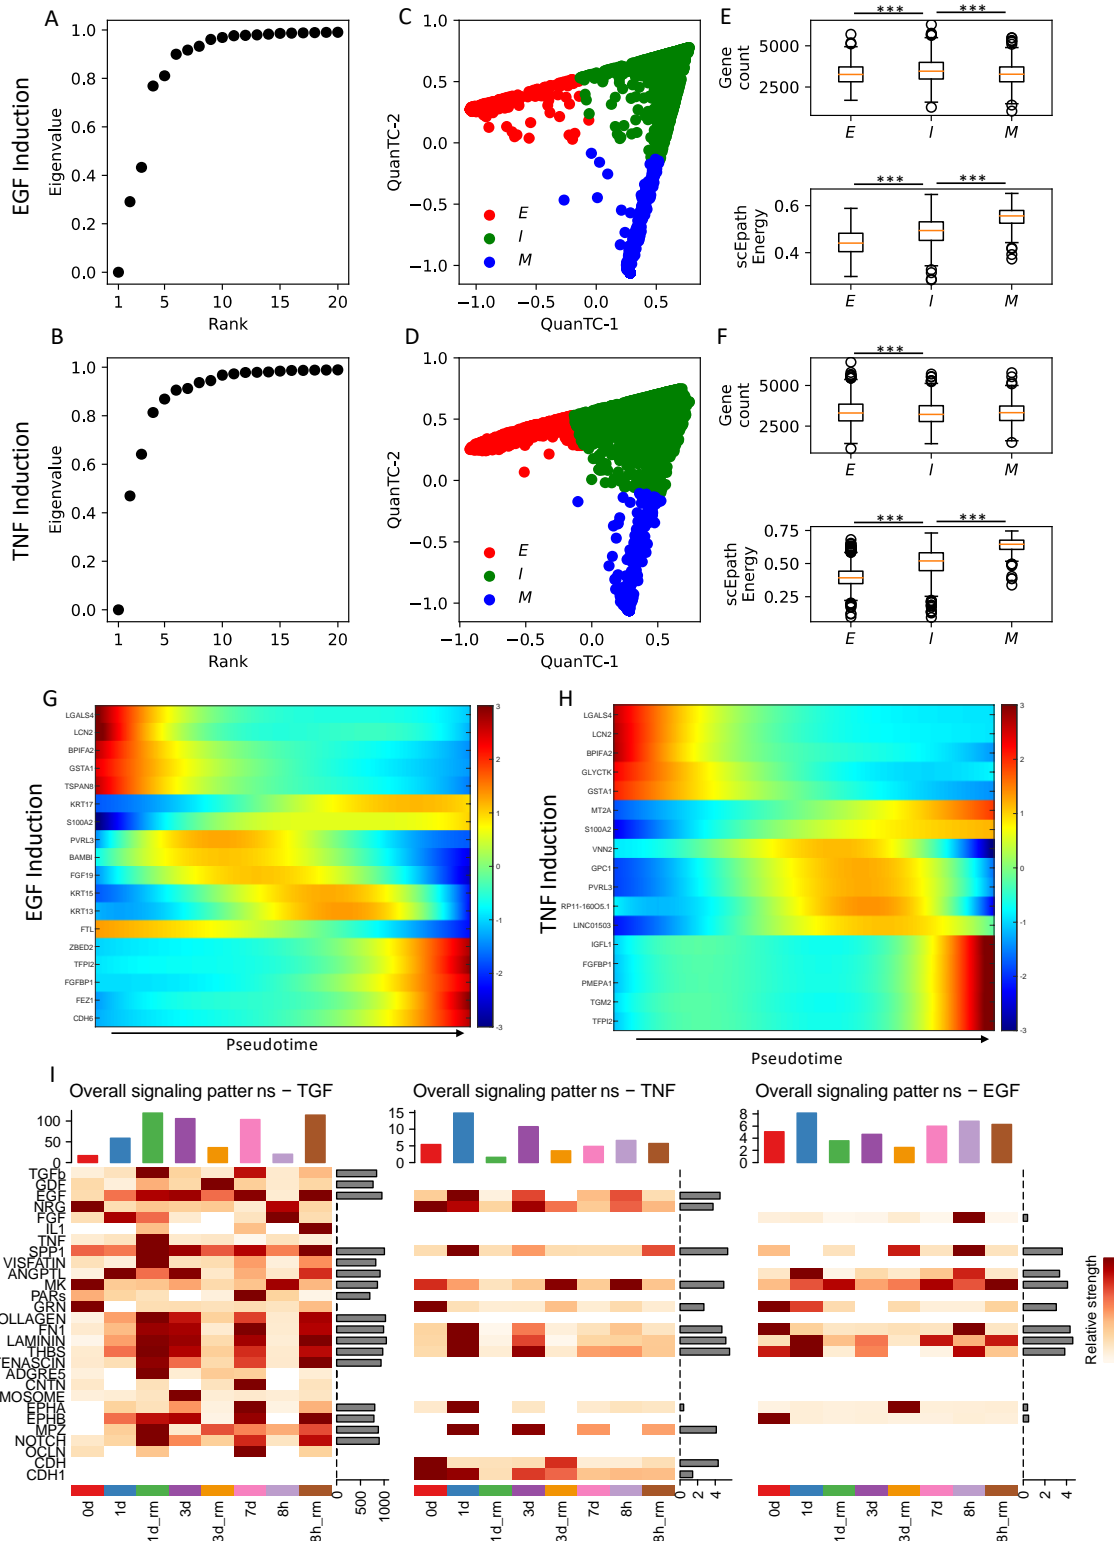

Supplementary Figure S6. **Comparison between EMT inducers in OVCA420 cells.** (A) Eigenvalues of the similarity matrix ranked in ascending order for OVCA420 cells under EGF induction. (C) Low-dimensional representation of cells in the OVCA420 dataset under EGF induction. (E) Transcriptional diversity and developmental energy for OVCA420 cells under EGF induction. (B-D-F) Same as (A-C-E) for TNF induction. (G-H) Top marker and transition genes identified by QuanTC along the most probable transition path for EGF-driven EMT (G) and TNF-driven EMT (H). (I) Comparison of overall signaling pathway strength between TGF-beta induction, EGF induction and TNF induction computed with CellChat.





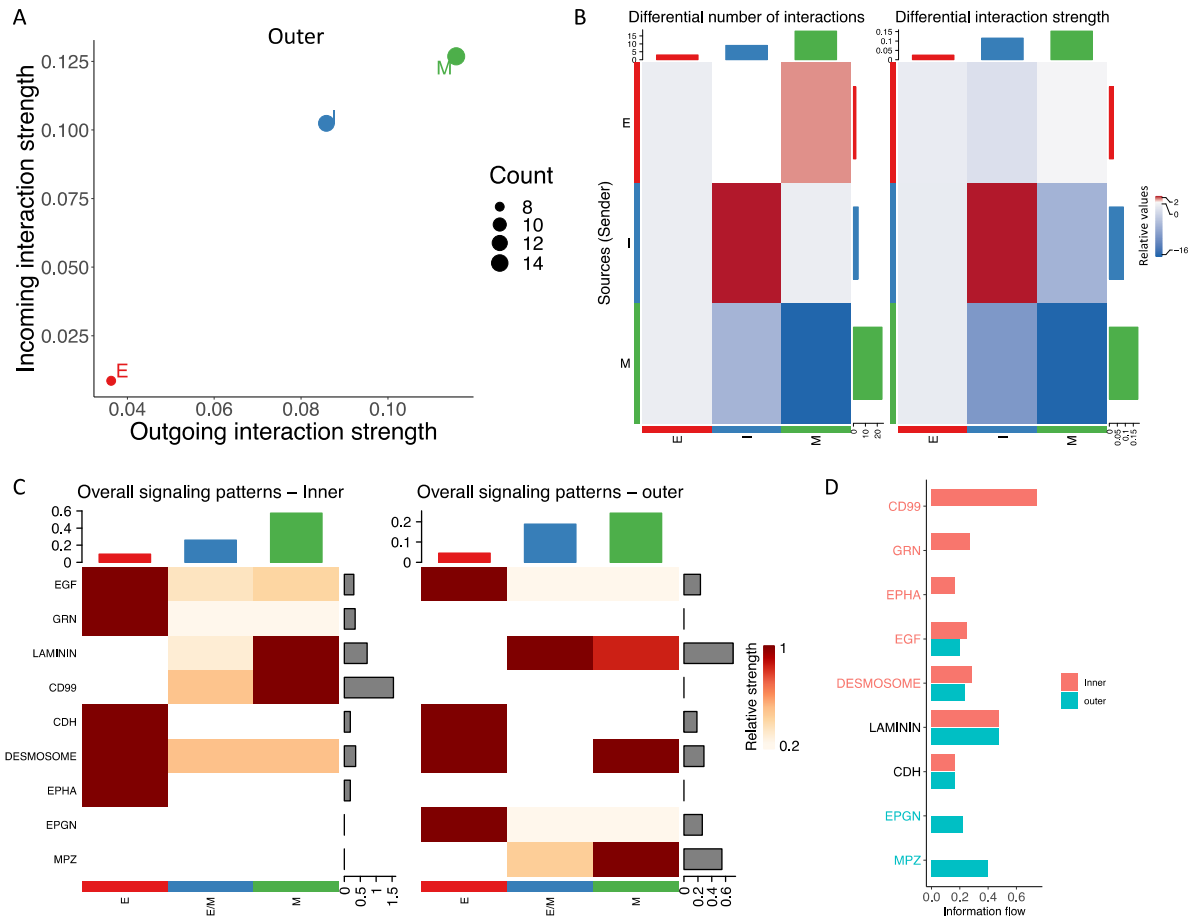

Supplementary Figure S8. **Cellchat analysis of MCF10A cells.** **(A)** Low-dimensional projection of cell clusters from the Outer dataset in an incoming/outgoing signaling strength space computed with CellChat. **(B)** Heatmap quantifying the fold-change in pairwise cluster-cluster signaling between the Inner and Outer cell populations. Blue coloring indicates that the signaling is stronger in the Inner population, while red coloring indicates stronger signaling in the Outer population. **(C)** Comparison of signaling patterns between Inner and Outer cell populations. Top bar plots summarize the signaling strength of each cluster (all pathways considered), while the rightmost bar plots quantify the overall strength of the specific pathways (all clusters considered). **(D)** Information flow of highly expressed signaling pathways in the Inner (pink) and Outer (cyan) cell populations.

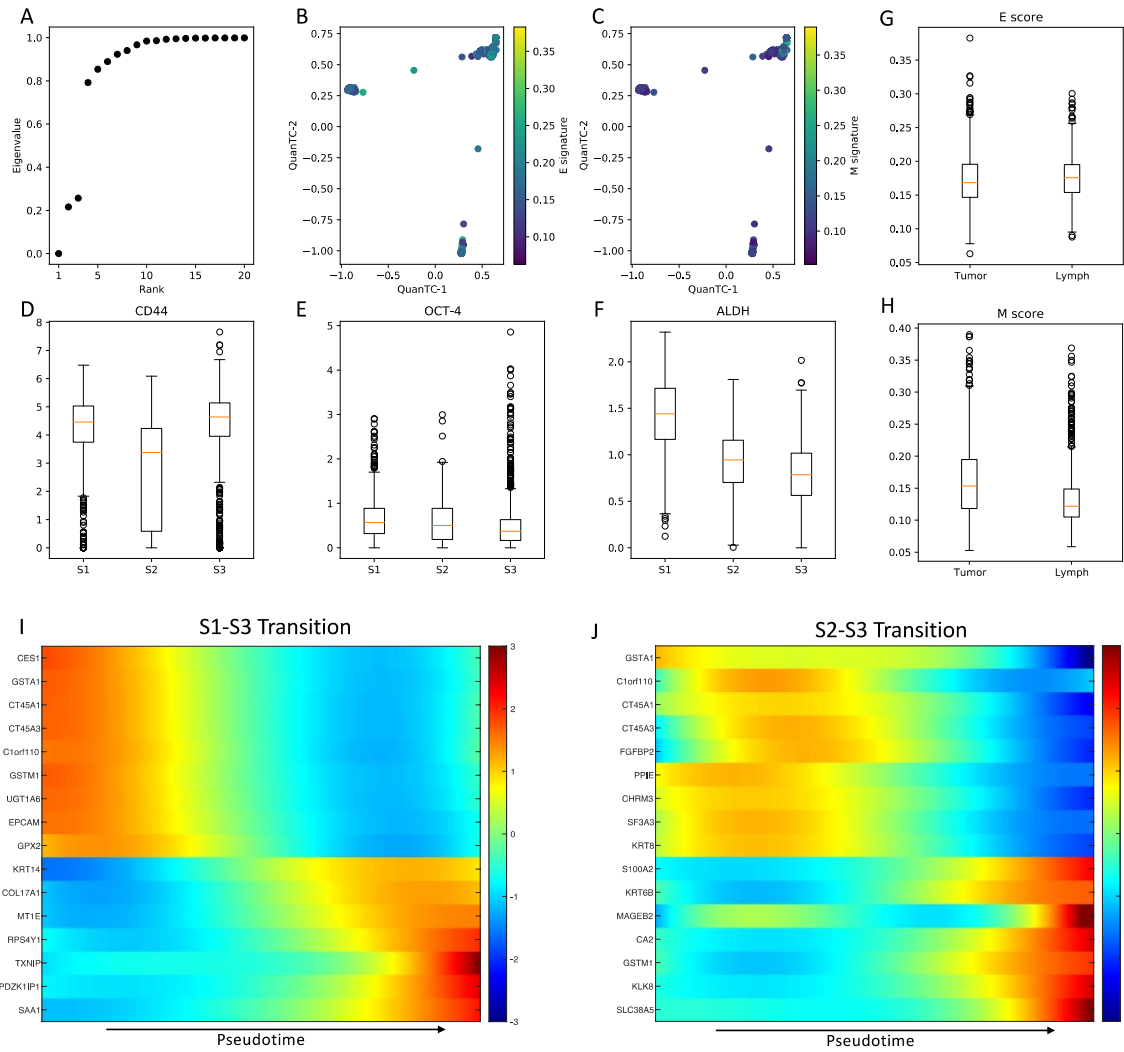

Supplementary Figure S9. **Clustering and analysis of HNSCC cells.** (A) Eigenvalues of the similarity matrix ranked in ascending order for the HNSCC dataset. (B-C) Epithelial and Mesenchymal signatures of cells in low-dimensional QuantTC projection space. (D-E-F) Boxplot of CD44, OCT-4, and ALDH1 expression in the three HNSCC clusters. (G-H) Boxplot of E and M scores in tumor vs. lymph node metastasis. (I-J) Top marker and transition genes identified by QuantTC along S1-S3 (I) and the S2-S3 (J) transition paths. The S3-S2 transition path exhibits the same heatmap of panel (H) with inverted pseudotime axis.

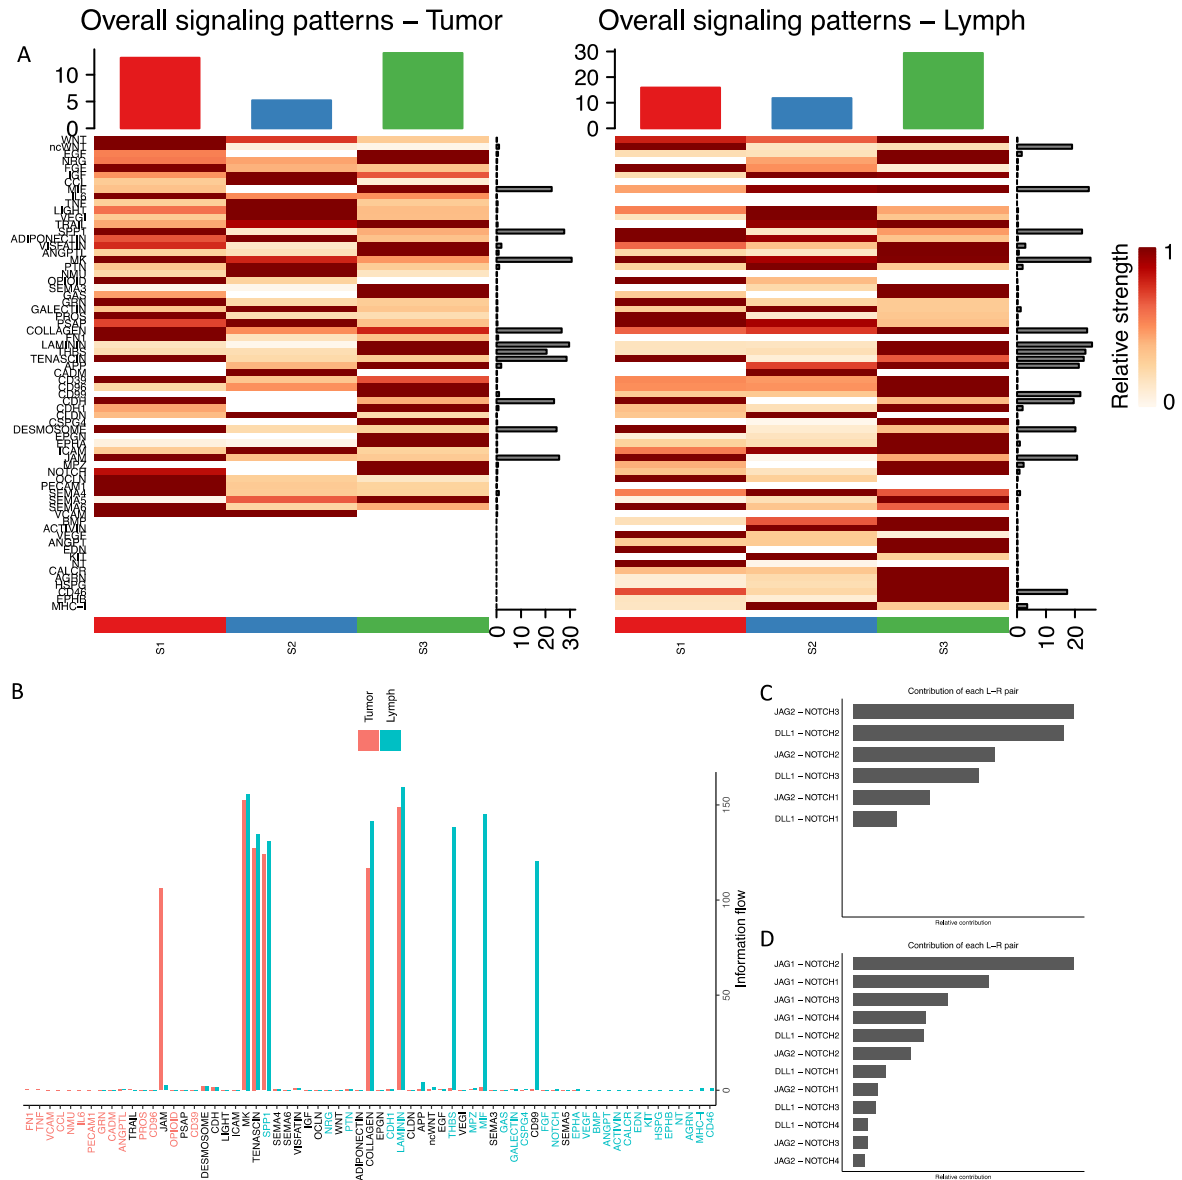

Supplementary Figure S10. **Cellchat analysis of HNSCC cells. (A)** Comparison of signaling patterns between Tumor and Lymph node cells. Top bar plots summarize the signaling strength of each cluster (all pathways considered), while the rightmost bar plots quantify the overall strength of the specific pathways (all clusters considered). **(B)** Information flow of highly expressed signaling pathways in the Tumor (pink) and Lymph nodes (cyan). **(C-D)** Comparison of pairwise ligand-receptor contribution to Notch signaling in tumor (C) vs lymph nodes (D).

**Supplementary Table S1.** List of up-regulated and down-regulated EMT genes (separate file).

| E genes  | M genes |
|----------|---------|
| ADORA2B  | ABCA1   |
| ALDH1A3  | ACTN1   |
| ALDH3A2  | JAG1    |
| ANK3     | ALOX5AP |
| BIRC3    | APBB2   |
| AQP3     | ARNTL   |
| AREG     | BMP1    |
| CFB      | BMP2    |
| DST      | BMPR2   |
| CD9      | BPGM    |
| CDH1     | CALD1   |
| CEBPD    | RUNX2   |
| CP       | CD59    |
| CXADR    | CDH2    |
| CYB5A    | CDH11   |
| CYP1B1   | COL1A1  |
| DEFB1    | COL3A1  |
| SERPINB1 | COL4A1  |
| ELF3     | COL4A2  |
| EMP1     | COL5A1  |
| EPAS1    | COL5A2  |
| ERBB3    | COL6A3  |
| EREG     | COL7A1  |
| GLDC     | VCAN    |
| CFH      | CTGF    |
| FOXA2    | SLC26A2 |
| HPGD     | ELK3    |
| IMPA2    | EML1    |
| INHBB    | EPHB2   |
| JAG2     | ETS2    |
| KRT15    | FBN1    |
| KRT19    | FOXD1   |
| LAMA5    | FN1     |
| LCN2     | GNG11   |
| ABLIM1   | GRB10   |
| LY6E     | HMOX1   |
| TACSTD1  | HRH1    |
| MBP      | IGFBP5  |
| KITLG    | IGFBP7  |
| MITF     | IL11    |
| MMP7     | INHBA   |

|          |          |
|----------|----------|
| MUC1     | ITGA5    |
| CEACAM6  | ITGB3    |
| PDK4     | JARID2   |
| ATP8B1   | JUN      |
| PKP2     | JUNB     |
| PLS1     | KCNJ15   |
| PPL      | KCNMA1   |
| RARRES3  | LAMC2    |
| S100P    | LOX      |
| SCNN1A   | LUM      |
| SLPI     | SMAD7    |
| SORD     | MAF      |
| SOX2     | MATN3    |
| SULT1A1  | MFAP2    |
| TFAP2A   | MMP1     |
| NR2F2    | MMP2     |
| TNFAIP2  | MMP9     |
| TPD52L1  | MMP10    |
| ALDH5A1  | MN1      |
| SDPR     | GADD45B  |
| MAP7     | MYO10    |
| SLC16A7  | NCF2     |
| ARHGAP29 | NEDD9    |
| TJP2     | NKX3-1   |
| GDF15    | NT5E     |
| HS3ST1   | SERPINE1 |
| FGFBP1   | PDGFA    |
| TSPAN1   | PFTK1    |
| MPZL2    | SERPINE2 |
| SPRY1    | PIK3CD   |
| CITED2   | PLAUR    |
| VAV3     | PODXL    |
| AGR2     | HTRA1    |
| SLC27A2  | PSMD2    |
| TBC1D8   | PTHLH    |
| HRASLS3  | PTPRK    |
| PEG10    | RALA     |
| KIAA0182 | RGS4     |
| SYNE2    | SCG5     |
| NUP210   | SKIL     |
| RAB38    | SLCO2A1  |
| RAB26    | SLC22A4  |
| METTL7A  | SLN      |
| EHF      | SNAI2    |

|          |         |
|----------|---------|
| SMPDL3B  | SPARC   |
| SLCO4A1  | SPOCK1  |
| HOOK1    | STC1    |
| GULP1    | TAGLN   |
| LSR      | TCF4    |
| FLJ20273 | TBX3    |
| EPB41L4B | TGFB1   |
| MANSC1   | TGFB1I1 |
| RBM35A   | TGFB1   |
| PPP1R9A  | TGM2    |
| GOLSYN   | THBS1   |
| GPRC5C   | TIMP2   |
| MYO5C    | TNFAIP6 |
| RAB25    | TNS1    |
| MTUS1    | TPM1    |
| SQRDL    | TPM4    |
| DEPDC6   | TUBA4A  |
| C1ORF116 | TUFT1   |
| FA2H     | VEGFC   |
| C1ORF115 | VIM     |
| GRTP1    | WNT5A   |
| ERMP1    | TUBA1A  |
| TMEM30B  | SCG2    |
|          | TFPI2   |
|          | ADAM12  |
|          | HMGA2   |
|          | SRPX    |
|          | TAGLN2  |
|          | TPST2   |
|          | TPST1   |
|          | BHLHB2  |
|          | KLF7    |
|          | PEA15   |
|          | ADAM19  |
|          | INPP4B  |
|          | SPHK1   |
|          | AP1S2   |
|          | CRLF1   |
|          | PDLIM7  |
|          | PSCD1   |
|          | C5ORF13 |
|          | TP53I3  |
|          | MICAL2  |
|          | DOCK4   |

|  |          |
|--|----------|
|  | NUAK1    |
|  | MRC2     |
|  | GFPT2    |
|  | HS3ST3B1 |
|  | HS3ST3A1 |
|  | AKT3     |
|  | DHRS2    |
|  | FSTL3    |
|  | DLC1     |
|  | MYL9     |
|  | SEMA3C   |
|  | POSTN    |
|  | MAGED2   |
|  | FERMT2   |
|  | GLIPR1   |
|  | KDEL3    |
|  | HSF2BP   |
|  | PTPN21   |
|  | ADAMTS6  |
|  | DUSP10   |
|  | ZNF365   |
|  | DAAM1    |
|  | PALLD    |
|  | TMCC1    |
|  | KIAA0692 |
|  | RFTN1    |
|  | SACS     |
|  | PLEK2    |
|  | GREM1    |
|  | LOH3CR2A |
|  | DSE      |
|  | LMCD1    |
|  | CHST11   |
|  | GAL      |
|  | ANGPTL4  |
|  | C4ORF18  |
|  | DACT1    |
|  | CCDC99   |
|  | PID1     |
|  | LARP6    |
|  | GALNT10  |
|  | CHRNA9   |
|  | FLJ10357 |
|  | ARFGAP1  |

|  |          |
|--|----------|
|  | PDGFC    |
|  | NRIP3    |
|  | PMEPA1   |
|  | CXCR7    |
|  | XYLT1    |
|  | SMURF2   |
|  | C3ORF52  |
|  | FLJ14213 |
|  | FHOD3    |
|  | WNT5B    |
|  | LBH      |
|  | MAP1LC3B |
|  | DIXDC1   |
|  | FAM114A1 |
|  | MBOAT2   |
|  | SIK1     |
|  | C6ORF145 |
|  | AMIGO2   |
|  | VGLL3    |
|  | SRRD     |

| Path                  | Percentage of cells involved |
|-----------------------|------------------------------|
| <b>SCC</b>            |                              |
| E-I1-I2-M             | 84.2%                        |
| E-I1-M                | 65.6%                        |
| E-I2-I1-M             | 50.7%                        |
| E-I2-M                | 26.0%                        |
| E-M                   | 13.8%                        |
| <b>OVCA420 - TGFB</b> |                              |
| E-I1-I2-M             | 78.3%                        |
| E-I2-I1-M             | 50.6%                        |
| E-I1-M                | 45.9%                        |
| E-I2-M                | 35.5%                        |
| E-M                   | 8.8%                         |
| <b>OVCA420 - EGF</b>  |                              |
| E-I-M                 | 83.1%                        |
| E-M                   | 21.6%                        |
| <b>OVCA420 - TNF</b>  |                              |
| E-I-M                 | 95.1%                        |
| E-M                   | 5.8%                         |
| <b>MCF10A - Inner</b> |                              |
| E-I-M                 | 95.4%                        |
| E-M                   | 14.3%                        |
| <b>MCF10A - Outer</b> |                              |
| E-I-M                 | 96.6%                        |
| E-M                   | 17.1%                        |
| <b>HNSCC</b>          |                              |
| S1-S3                 | 81.5%                        |



|       |       |
|-------|-------|
| S2-S3 | 18.4% |
| S3-S2 | 18.4% |

**Supplementary Table S2.** EMT paths identified by QuanTC. Note: cells can be members of more than one pathway; therefore, the percentages do not sum to 100%.
